# Supplementary material for: Identification of cadaveric liver tissues using thanatotranscriptome biomarkers
Source: PubMed Central journal article supplement (PMC7170907; doi:10.1038/s41598-020-63727-9), 2020-04-20
Supplement: 41598_2020_63727_MOESM1_ESM.pdf [file 41598_2020_63727_MOESM1_ESM.pdf]

## **Identification of cadaveric liver tissues using thanatotranscriptome biomarkers**

Gulnaz T. Javan<sup>1\*</sup>, Erin Hanson<sup>2</sup>, Sheree J. Finley<sup>1</sup>, Silvia D. Visonà<sup>3</sup>, Antonio Osculati<sup>3</sup>, Jack Ballantyne<sup>2</sup>

<sup>1</sup>Forensic Science Program, Physical Sciences Department, Alabama State University, Montgomery, AL

<sup>2</sup>National Center for Forensic Science, University of Central Florida, Orlando, FL

<sup>3</sup>Department of Public Health, Experimental and Forensic Medicine, University of Pavia, Pavia, Italy

### **\*Corresponding Author**

Alabama State University  
Physical Sciences Department  
Forensic Science Programs  
915 S. Jackson Street  
Montgomery, AL 36104  
Email: [gjavan@alasu.edu](mailto:gjavan@alasu.edu)  
Phone: 334-604-8130

**Table S1.** Tissue Specificity of Read Counts of 46 Gene Biomarkers in Italian Cases

|                 |          | Postmortem Interval (PMI) |         |         |           |         |        |         |           |       |         |        |         |        |        |       |        |         |       |
|-----------------|----------|---------------------------|---------|---------|-----------|---------|--------|---------|-----------|-------|---------|--------|---------|--------|--------|-------|--------|---------|-------|
| Gene Name       |          | 38hr                      | 42hr    | 48hr    | 50hr      | 60hr    | 60hr   | 65hr    | 72hr      | 72hr  | 80hr    | 4d     | 108hr   | 5d     | 144hr  | 6d    | 7d     | 37d     |       |
| Brain           | SNAP25   | 0                         | 0       | 0       | 0         | 0       | 0      | 0       | 0         | 0     | 0       | 0      | 0       | 0      | 0      | 0     | 0      | 0       |       |
|                 | RTN1     | 0                         | 0       | 0       | 0         | 0       | 0      | 0       | 0         | 0     | 0       | 0      | 0       | 0      | 0      | 0     | 0      | 0       |       |
|                 | GABRA1   | 0                         | 0       | 0       | 0         | 0       | 0      | 0       | 0         | 0     | 0       | 0      | 0       | 0      | 0      | 0     | 0      | 0       |       |
|                 | OPALIN   | 0                         | 0       | 0       | 0         | 0       | 0      | 0       | 0         | 0     | 0       | 0      | 0       | 0      | 0      | 0     | 0      | 0       |       |
|                 | GFAP     | 0                         | 0       | 0       | 0         | 0       | 0      | 0       | 0         | 0     | 0       | 0      | 0       | 0      | 0      | 0     | 0      | 0       |       |
|                 | NEUROD6  | 0                         | 0       | 0       | 0         | 0       | 0      | 0       | 0         | 0     | 0       | 0      | 0       | 0      | 0      | 0     | 0      | 0       |       |
| Lung            | SFTPB    | 0                         | 0       | 0       | 0         | 0       | 0      | 0       | 0         | 0     | 0       | 0      | 0       | 0      | 0      | 0     | 0      | 0       |       |
|                 | SFTPD    | 0                         | 0       | 0       | 0         | 0       | 0      | 0       | 0         | 0     | 0       | 0      | 0       | 0      | 0      | 0     | 0      | 0       |       |
|                 | SFTPA1   | 0                         | 0       | 0       | 0         | 0       | 0      | 0       | 0         | 0     | 0       | 0      | 0       | 0      | 0      | 0     | 0      | 0       |       |
| Trachea         | BPIFB1   | 0                         | 0       | 0       | 0         | 0       | 0      | 0       | 0         | 0     | 0       | 0      | 0       | 0      | 0      | 0     | 0      | 0       |       |
| Liver           | AMBP     | 107441                    | 68337   | 93613   | 675279    | 16121   | 24766  | 161803  | 178151    | 5824  | 104827  | 30196  | 10568   | 6404   | 33700  | 8913  | 0      | 61645   |       |
|                 | F2       | 34146                     | 6360    | 32084   | 147187    | 27338   | 6079   | 72986   | 75618     | 0     | 15209   | 19054  | 0       | 0      | 0      | 0     | 0      | 0       |       |
|                 | CFHR2    | 15520                     | 2154    | 10796   | 20488     | 0       | 4432   | 11209   | 0         | 0     | 3231    | 3757   | 0       | 0      | 0      | 0     | 0      | 0       |       |
|                 | F9       | 0                         | 0       | 5857    | 23521     | 989     | 0      | 7381    | 0         | 0     | 0       | 0      | 6984    | 0      | 0      | 0     | 0      | 0       | 6032  |
|                 | AHSG     | 524477                    | 202367  | 473793  | 1284572   | 81272   | 49107  | 353684  | 831523    | 542   | 246640  | 32828  | 93624   | 10885  | 40898  | 0     | 51560  | 254777  |       |
|                 | C9       | 41351                     | 19764   | 58902   | 35359     | 0       | 15476  | 0       | 0         | 0     | 8167    | 13178  | 0       | 0      | 0      | 0     | 0      | 0       | 24466 |
|                 | SPP2     | 18082                     | 3982    | 8327    | 36191     | 0       | 0      | 11913   | 12283     | 2603  | 18070   | 0      | 1341    | 0      | 0      | 0     | 0      | 0       | 0     |
| MBL2            | 24361    | 23876                     | 14268   | 78799   | 0         | 0       | 0      | 0       | 0         | 0     | 0       | 0      | 0       | 0      | 0      | 0     | 0      | 0       |       |
| Skeletal Muscle | TNNI2    | 0                         | 0       | 8158    | 0         | 0       | 0      | 0       | 0         | 0     | 0       | 0      | 0       | 0      | 0      | 0     | 0      | 0       |       |
|                 | MYLK2    | 0                         | 0       | 0       | 0         | 0       | 0      | 0       | 0         | 0     | 0       | 0      | 0       | 0      | 0      | 0     | 0      | 0       |       |
|                 | ATP2A1   | 0                         | 0       | 0       | 0         | 0       | 0      | 9206    | 0         | 0     | 0       | 0      | 0       | 0      | 0      | 0     | 0      | 0       |       |
|                 | MYH2     | 0                         | 0       | 0       | 0         | 0       | 0      | 0       | 0         | 0     | 0       | 0      | 0       | 0      | 0      | 0     | 0      | 0       |       |
|                 | NEB      | 0                         | 0       | 0       | 0         | 0       | 0      | 0       | 0         | 0     | 0       | 0      | 0       | 0      | 0      | 0     | 0      | 0       |       |
|                 | MYLPF    | 0                         | 0       | 0       | 0         | 0       | 0      | 0       | 0         | 0     | 0       | 0      | 0       | 0      | 0      | 0     | 0      | 0       |       |
| Heart           | ITGB1BP3 | 0                         | 0       | 0       | 0         | 0       | 0      | 0       | 0         | 0     | 0       | 0      | 0       | 0      | 0      | 0     | 0      | 0       |       |
|                 | MYBPC3   | 0                         | 0       | 0       | 0         | 0       | 0      | 0       | 0         | 0     | 0       | 0      | 0       | 0      | 0      | 0     | 0      | 0       |       |
|                 | NPPB     | 0                         | 0       | 0       | 0         | 0       | 0      | 0       | 0         | 0     | 0       | 0      | 0       | 0      | 0      | 0     | 0      | 0       |       |
|                 | NPPA     | 0                         | 0       | 0       | 0         | 0       | 0      | 0       | 0         | 0     | 0       | 0      | 0       | 0      | 0      | 0     | 0      | 0       |       |
|                 | TNNI3    | 0                         | 0       | 0       | 0         | 0       | 0      | 0       | 0         | 0     | 0       | 0      | 0       | 0      | 0      | 0     | 0      | 0       |       |
| Kidney          | UMOD     | 0                         | 0       | 0       | 0         | 0       | 0      | 0       | 0         | 0     | 0       | 0      | 0       | 0      | 0      | 0     | 0      | 0       |       |
|                 | SLC12A1  | 0                         | 0       | 0       | 0         | 0       | 0      | 0       | 0         | 0     | 0       | 0      | 0       | 0      | 0      | 0     | 0      | 0       |       |
|                 | SLC34A1  | 0                         | 0       | 0       | 0         | 0       | 0      | 0       | 0         | 0     | 0       | 0      | 0       | 0      | 0      | 0     | 0      | 0       |       |
|                 | SLC22A12 | 0                         | 0       | 0       | 0         | 0       | 0      | 0       | 0         | 0     | 0       | 0      | 0       | 0      | 0      | 0     | 0      | 0       |       |
| Adipose         | TUSC5    | 0                         | 0       | 0       | 0         | 0       | 0      | 0       | 0         | 0     | 0       | 0      | 0       | 0      | 0      | 0     | 0      | 0       |       |
|                 | ADIPOQ   | 0                         | 0       | 0       | 0         | 0       | 0      | 0       | 0         | 0     | 0       | 0      | 0       | 0      | 0      | 0     | 0      | 0       |       |
|                 | PLIN1    | 0                         | 6412    | 0       | 17621     | 0       | 0      | 0       | 0         | 0     | 6127    | 0      | 0       | 0      | 0      | 0     | 0      | 0       |       |
| Intestine       | FABP6    | 0                         | 0       | 0       | 0         | 0       | 0      | 0       | 0         | 0     | 0       | 0      | 0       | 0      | 0      | 0     | 0      | 0       |       |
|                 | CCL25    | 0                         | 0       | 0       | 0         | 0       | 0      | 0       | 0         | 0     | 0       | 0      | 0       | 0      | 0      | 0     | 0      | 0       |       |
|                 | DEFA5    | 0                         | 0       | 0       | 0         | 0       | 0      | 0       | 0         | 0     | 0       | 0      | 0       | 0      | 0      | 0     | 0      | 0       |       |
|                 | DEFA6    | 0                         | 0       | 0       | 0         | 0       | 0      | 0       | 0         | 0     | 0       | 0      | 0       | 0      | 0      | 0     | 0      | 0       |       |
|                 | LCT      | 0                         | 0       | 0       | 0         | 0       | 0      | 0       | 0         | 0     | 0       | 0      | 0       | 0      | 0      | 0     | 0      | 0       |       |
| Stomach         | PGA3     | 0                         | 0       | 0       | 0         | 0       | 0      | 0       | 0         | 0     | 0       | 0      | 0       | 0      | 0      | 0     | 0      | 0       |       |
|                 | PGA4     | 0                         | 0       | 0       | 0         | 0       | 0      | 0       | 0         | 0     | 0       | 0      | 0       | 0      | 0      | 0     | 0      | 0       |       |
|                 | GIF      | 0                         | 0       | 0       | 0         | 0       | 0      | 0       | 0         | 0     | 0       | 0      | 0       | 0      | 0      | 0     | 0      | 0       |       |
|                 | GKN1     | 0                         | 0       | 0       | 0         | 0       | 0      | 0       | 0         | 0     | 0       | 0      | 0       | 0      | 0      | 0     | 0      | 0       |       |
|                 | PGA5     | 0                         | 0       | 0       | 0         | 0       | 0      | 0       | 0         | 0     | 0       | 0      | 0       | 0      | 0      | 0     | 0      | 0       |       |
| Average Total   |          | 765,378                   | 333,252 | 705,798 | 2,319,017 | 125,720 | 99,860 | 628,182 | 1,097,575 | 8,969 | 402,271 | 99,013 | 112,517 | 17,289 | 74,598 | 8,913 | 51,560 | 346,920 |       |

---

Average read counts of liver biomarker in Italian liver tissue samples (calculated from N=17 cases). For each donor liver tissue, the average total read counts are listed. Only samples with total read counts greater than 5000 were analyzed. Average read counts in red indicate read counts for biomarkers representing tissues from other organs.

**Table S2.** Tissue Specificity of Read Counts of 46 Gene Biomarkers in United States Cases

| Postmortem Interval (PMI) |           |       |        |        |        |        |        |        |        |        |        |
|---------------------------|-----------|-------|--------|--------|--------|--------|--------|--------|--------|--------|--------|
|                           | Gene Name | 3.5hr | 6hr    | 9hr    | 13hr   | 15hr   | 17hr   | 20.5hr | 22hr   | 29.5hr | 32hr   |
| Brain                     | SNAP25    | 0     | 0      | 0      | 0      | 0      | 0      | 0      | 0      | 0      | 0      |
|                           | RTN1      | 0     | 0      | 0      | 0      | 0      | 0      | 0      | 0      | 0      | 0      |
|                           | GABRA1    | 0     | 0      | 0      | 0      | 0      | 0      | 0      | 0      | 0      | 0      |
|                           | OPALIN    | 0     | 0      | 0      | 0      | 0      | 0      | 0      | 0      | 0      | 0      |
|                           | GFAP      | 0     | 0      | 0      | 0      | 0      | 0      | 0      | 0      | 0      | 0      |
| NEUROD6                   | 0         | 0     | 0      | 0      | 0      | 0      | 0      | 0      | 0      | 0      |        |
| Lung                      | SFTPB     | 0     | 0      | 0      | 0      | 0      | 0      | 0      | 0      | 0      | 0      |
|                           | SFTPD     | 0     | 0      | 0      | 0      | 0      | 0      | 0      | 0      | 0      | 0      |
|                           | SFTPA1    | 0     | 0      | 0      | 0      | 0      | 0      | 0      | 0      | 0      | 0      |
| Trachea                   | BPIFB1    | 0     | 0      | 0      | 0      | 0      | 0      | 0      | 0      | 0      | 0      |
| Liver                     | AMBP      | 3400  | 23637  | 9619   | 17204  | 4083   | 28850  | 24170  | 26111  | 11409  | 4522   |
|                           | F2        | 885   | 2906   | 1627   | 2239   | 1904   | 3029   | 3209   | 1425   | 2148   |        |
|                           | CFHR2     | 0     | 0      | 0      | 514    | 0      | 1677   | 2340   | 0      | 0      | 0      |
|                           | F9        | 0     | 632    | 0      | 0      | 0      | 839    | 1536   | 0      | 0      | 0      |
|                           | AHSG      | 0     | 0      | 0      | 0      | 0      | 0      | 0      | 0      | 0      | 0      |
|                           | C9        | 0     | 1824   | 1888   | 1427   | 0      | 3498   | 3505   | 992    | 513    | 0      |
|                           | SPP2      | 2843  | 27518  | 11314  | 22050  | 9967   | 59891  | 56872  | 16416  | 8132   | 5444   |
| MBL2                      | 0         | 0     | 3569   | 3127   | 838    | 0      | 541    | 774    | 686    | 801    |        |
| Skeletal Muscle           | TNNI2     | 0     | 0      | 0      | 0      | 0      | 0      | 0      | 0      | 0      | 0      |
|                           | MYLK2     | 0     | 0      | 0      | 0      | 0      | 0      | 0      | 0      | 0      | 0      |
|                           | ATP2A1    | 0     | 0      | 0      | 0      | 0      | 0      | 0      | 0      | 0      | 0      |
|                           | MYH2      | 0     | 0      | 0      | 0      | 0      | 0      | 0      | 0      | 0      | 0      |
|                           | NEB       | 0     | 0      | 0      | 0      | 0      | 0      | 0      | 0      | 0      | 0      |
|                           | MYLPF     | 0     | 0      | 0      | 0      | 0      | 0      | 0      | 0      | 0      | 0      |
| Heart                     | ITGB1BP3  | 0     | 0      | 0      | 0      | 0      | 0      | 0      | 0      | 0      | 0      |
|                           | MYBPC3    | 0     | 0      | 0      | 0      | 0      | 0      | 0      | 0      | 0      | 0      |
|                           | NPPB      | 0     | 0      | 0      | 0      | 0      | 0      | 0      | 0      | 0      | 0      |
|                           | NPPA      | 0     | 0      | 0      | 0      | 0      | 0      | 0      | 0      | 0      | 0      |
|                           | TNNI3     | 0     | 0      | 0      | 0      | 0      | 0      | 0      | 0      | 0      | 0      |
| Kidney                    | UMOD      | 0     | 0      | 0      | 0      | 0      | 0      | 0      | 0      | 0      | 0      |
|                           | SLC12A1   | 0     | 0      | 0      | 0      | 0      | 0      | 0      | 0      | 0      | 0      |
|                           | SLC34A1   | 0     | 0      | 0      | 0      | 0      | 0      | 0      | 0      | 0      | 0      |
|                           | SLC22A12  | 0     | 0      | 0      | 0      | 0      | 0      | 0      | 0      | 0      | 0      |
| Adipose                   | TUSC5     | 0     | 0      | 0      | 0      | 0      | 0      | 0      | 0      | 0      | 0      |
|                           | ADIPOQ    | 0     | 0      | 0      | 0      | 0      | 0      | 0      | 0      | 0      | 0      |
|                           | PLIN1     | 0     | 0      | 0      | 0      | 0      | 0      | 0      | 0      | 0      | 0      |
| Intestine                 | FABP6     | 0     | 0      | 0      | 0      | 0      | 0      | 0      | 0      | 0      | 0      |
|                           | CCL25     | 0     | 0      | 0      | 0      | 0      | 0      | 0      | 0      | 0      | 0      |
|                           | DEFA5     | 0     | 0      | 0      | 0      | 0      | 0      | 0      | 0      | 0      | 0      |
|                           | DEFA6     | 0     | 0      | 0      | 0      | 0      | 0      | 0      | 0      | 0      | 6169   |
|                           | LCT       | 0     | 0      | 0      | 0      | 0      | 0      | 0      | 0      | 0      | 4042   |
| Stomach                   | PGA3      | 0     | 0      | 598    | 0      | 0      | 0      | 0      | 0      | 0      | 0      |
|                           | PGA4      | 0     | 0      | 0      | 0      | 0      | 0      | 0      | 0      | 0      | 0      |
|                           | GIF       | 0     | 0      | 0      | 0      | 0      | 0      | 0      | 0      | 0      | 0      |
|                           | GKN1      | 0     | 0      | 0      | 0      | 0      | 0      | 0      | 0      | 0      | 0      |
|                           | PGA5      | 0     | 0      | 0      | 0      | 0      | 0      | 0      | 0      | 0      | 0      |
| Average Total             |           | 7,128 | 56,517 | 28,615 | 46,561 | 16,792 | 97,784 | 92,173 | 45,718 | 22,888 | 20,978 |

---

Average read counts of liver biomarker in American liver tissue samples (calculated from N=10 donors). For each donor liver tissue, the average total read counts are listed. Only samples with total read counts greater than 5000 were analyzed. Average read counts in red indicate read counts for biomarkers representing tissues from other organs.
